# Supplementary material for: Structural characterization of a new fluorophosphotellurite glass system
Source: Royal Society of Chemistry journal article supplement (doi:10.1039/d2dt03292a), 2022-12-15
Supplement: d2dt03292a1.pdf [file d2dt03292a1.pdf]

## Structural characterization of a new fluorophosphotellurite glass system

Renato Grigolon Capelo<sup>1#</sup>, Josef Maximilian Gerdes<sup>2#</sup>, Ulrich Rehfuß<sup>3#</sup>, Lais Dantas Silva<sup>5</sup>, Michael Ryan Hansen<sup>2\*</sup>, Leo van Wüllen<sup>3\*</sup>, Hellmut Eckert<sup>2,4\*</sup>, Danilo Manzani<sup>1\*</sup>

<sup>1</sup>*São Carlos Institute of Chemistry – IQSC, University of São Paulo – USP, São Carlos, SP, Brazil*

<sup>2</sup>*Institut of Physical Chemistry, WWU Münster, Germany*

<sup>3</sup>*Physics Institute, University of Augsburg, Germany*

<sup>4</sup>*São Carlos Institute of Physics – IFSC, University of São Paulo – USP, São Carlos, SP, Brazil*

<sup>5</sup> *Center of Research, Technology, and Education in Vitreous Materials (CeRTEV), Department of Materials Engineering (DEMa), Federal University of São Carlos (UFSCar), 13565-905, São Carlos, SP, Brazil.*

# Equally contributing authors

## Supplemental Materials

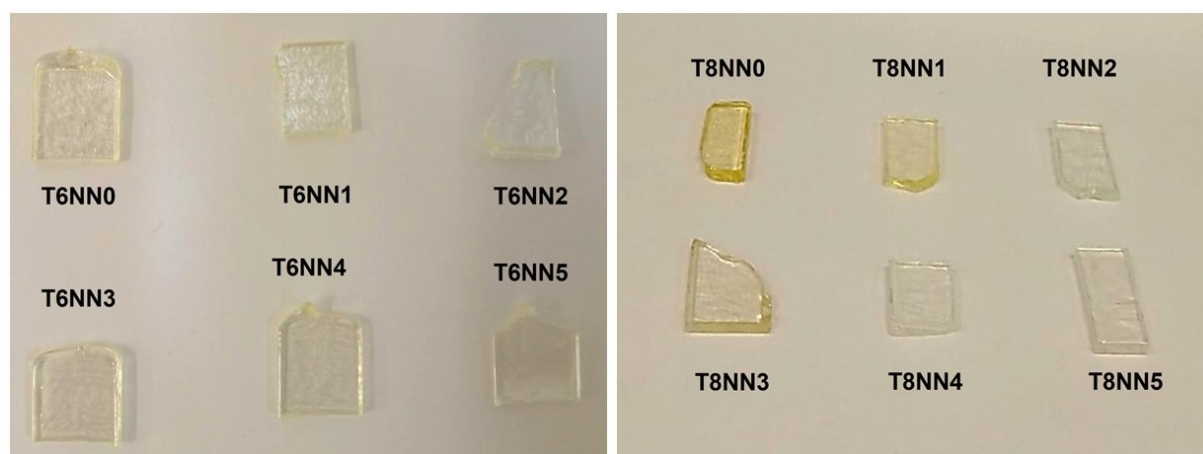

**Figure S1.** Photographs of the T6 and T8 set of glass samples.

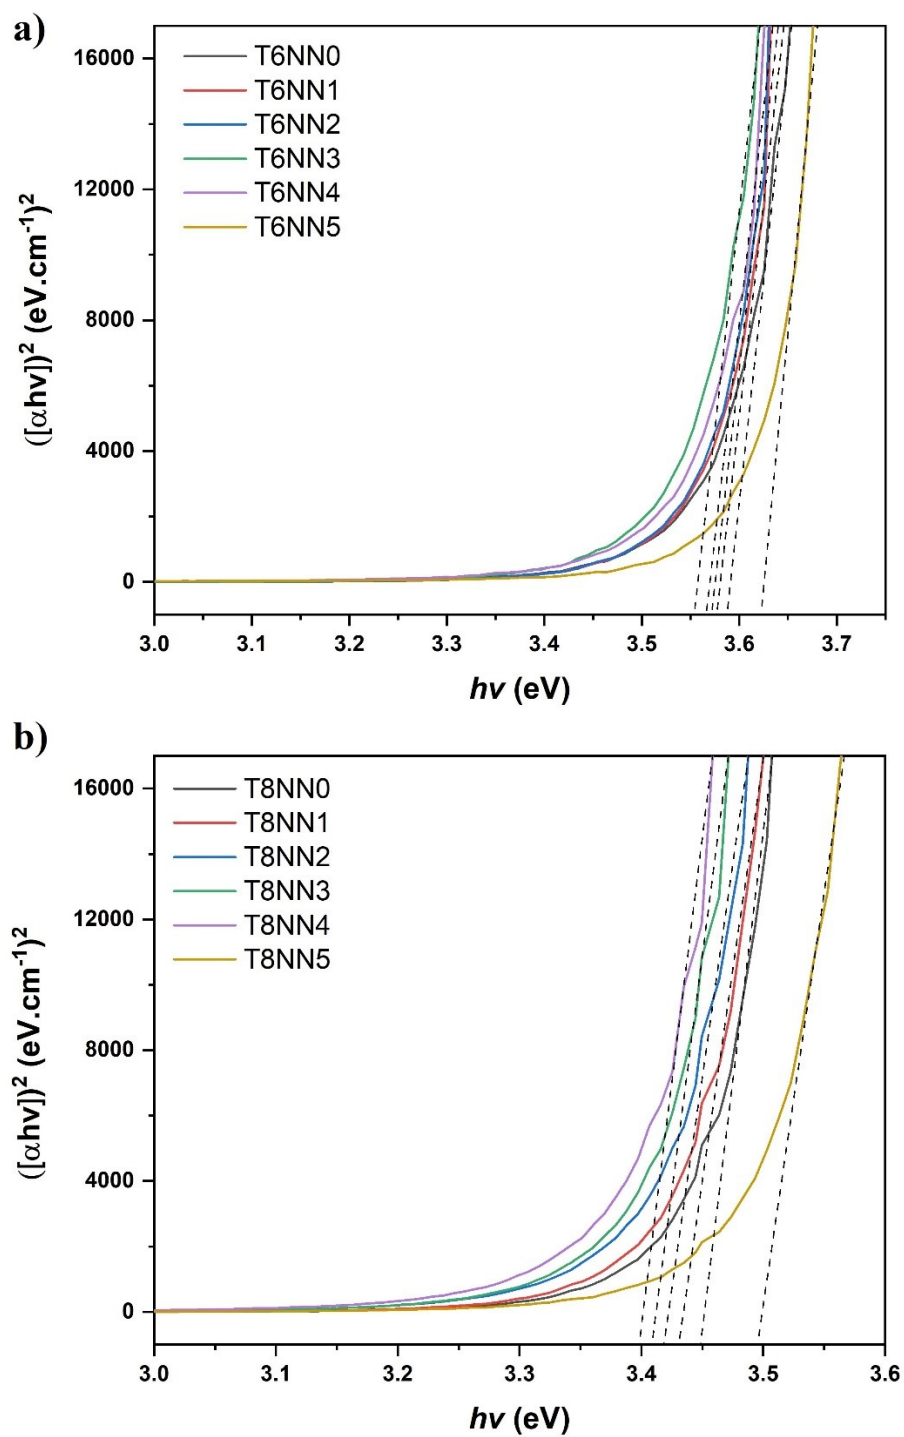

**Figure S2.** Curves  $[\alpha(h\nu)]^2$  vs.  $h\nu$  obtained from the absorption spectra of (a) T6, and (b) T8 set of glass samples.

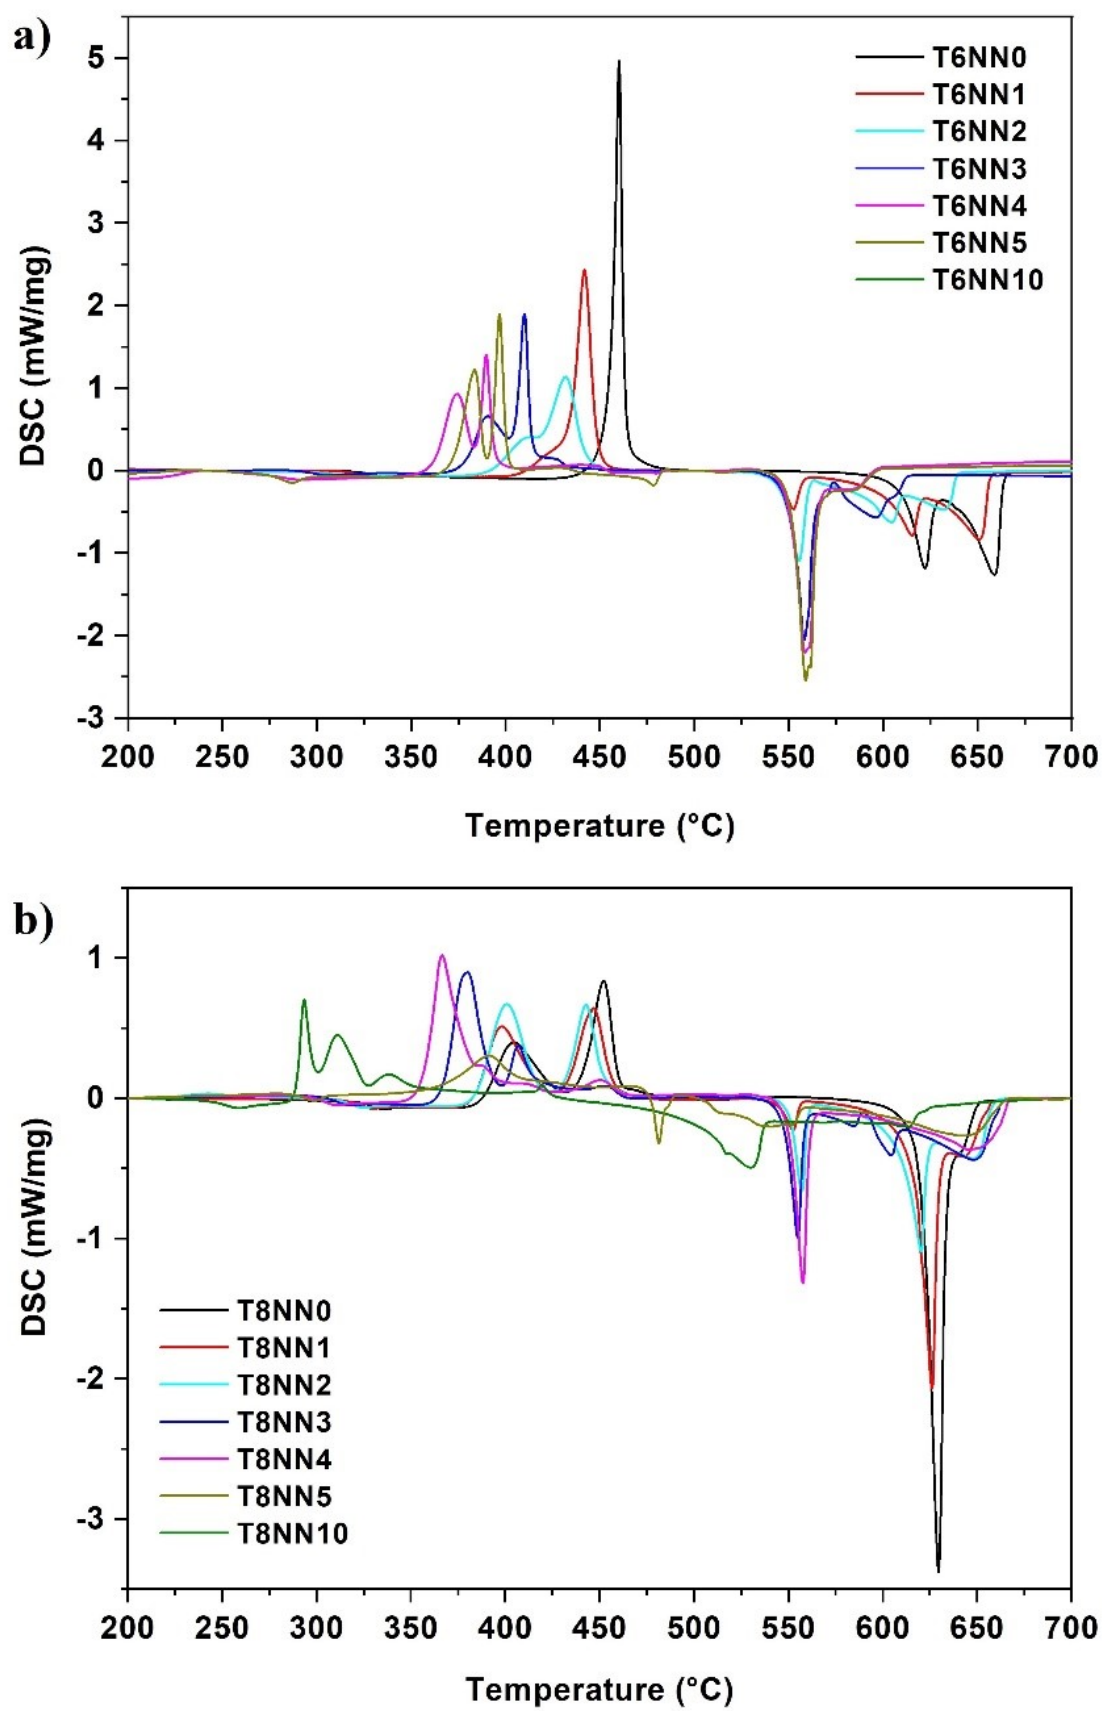

**Figure S3.** DSC curves for (a) series T6; and (b) series T8 of fluorophosphotellurite powder samples.

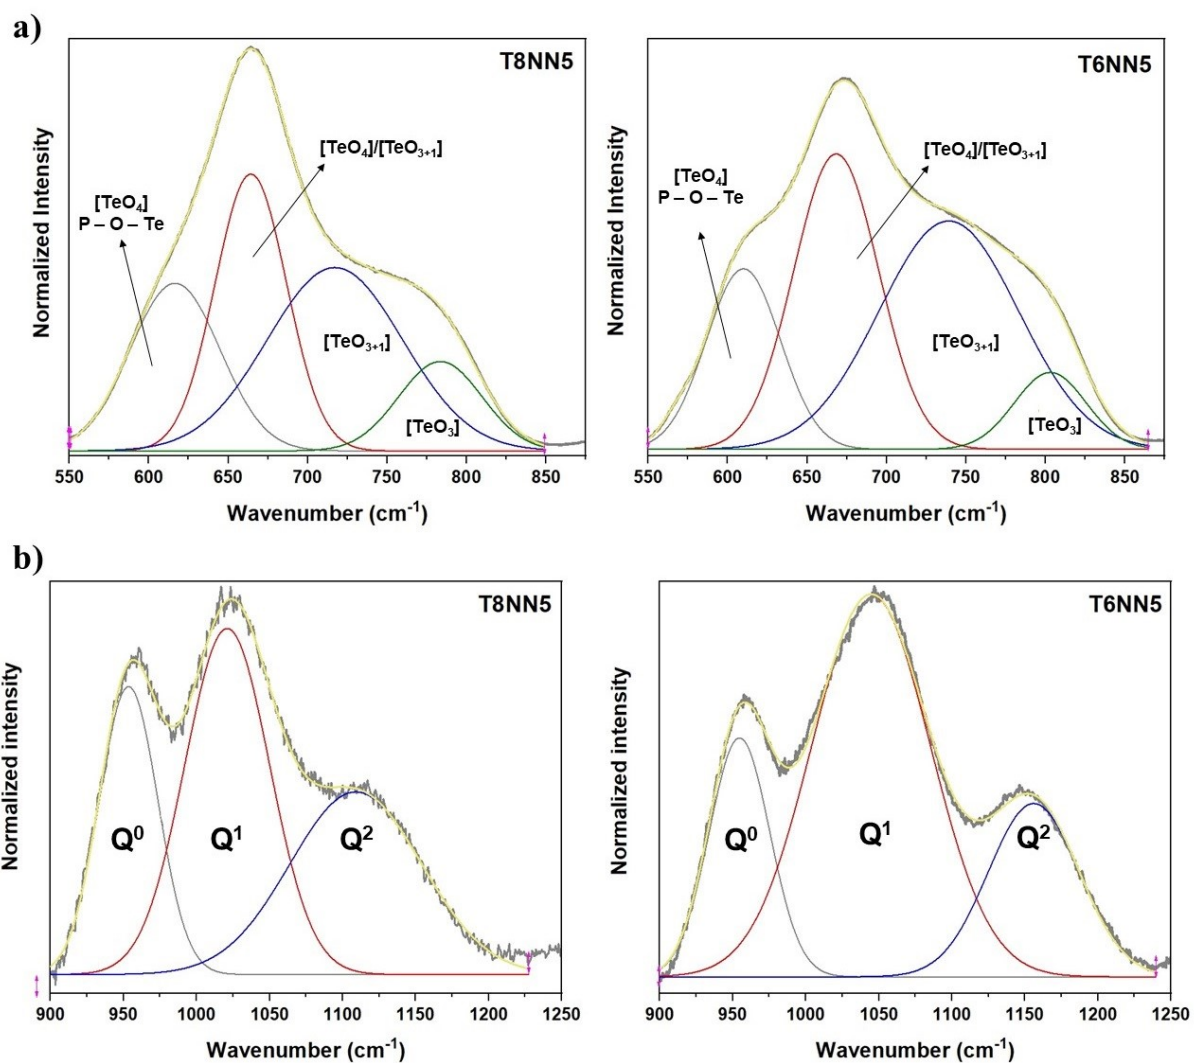

**Figure S4.** Representative Raman deconvoluted bands between (a) 550 to 900  $\text{cm}^{-1}$  (tellurite bands), and (b) 900 to 1250  $\text{cm}^{-1}$  (phosphate bands) for the T8NN5 and T6NN5 samples.

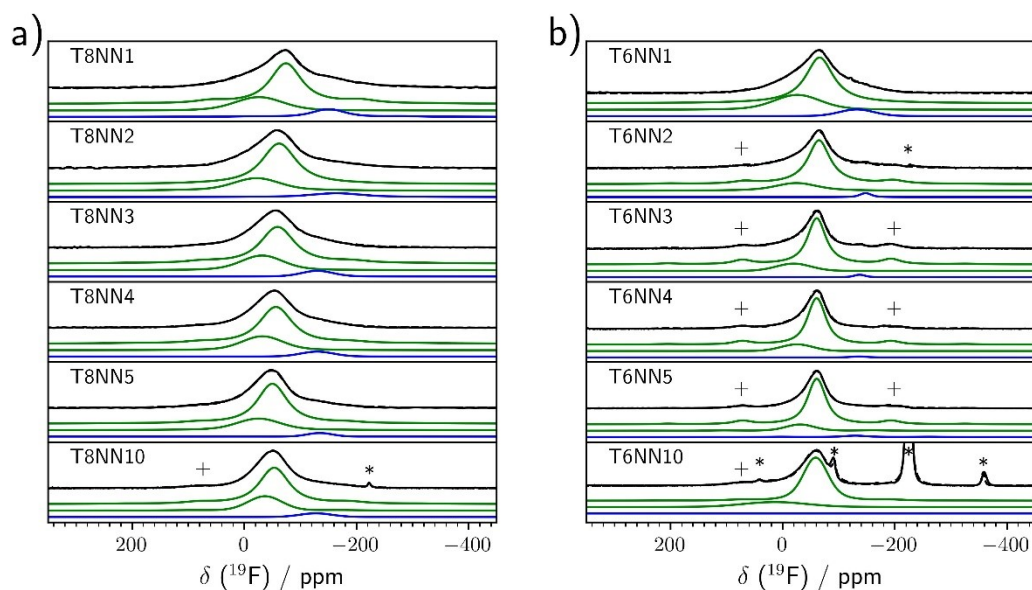

**Figure S5.**  $^{19}\text{F}$  MAS NMR spectra of the samples under study, recorded with a rotor-synchronized Hahn-echo sequence at a rotation frequency of 25 kHz. Experimental spectra are shown on top with each fit component from tentative deconvolutions stacked below in green and blue. Visible spinning side bands are marked with a + symbol, impurities of NaF with their respective spinning sidebands are marked with asterisks.

**Table S3.** Isotropic chemical shifts and fractional area in percent of the integral as obtained from the tentative fits to the  $^{19}\text{F}$  MAS NMR spectra to three distinct components.

| Sample | Component 1    |          | Component 2    |          | Component 3    |          |
|--------|----------------|----------|----------------|----------|----------------|----------|
|        | $\delta$ / ppm | Area / % | $\delta$ / ppm | Area / % | $\delta$ / ppm | Area / % |
| T6NN1  | -25.1          | 27       | -65.0          | 65       | -131.2         | 8        |
| T6NN2  | -23.5          | 19       | -63.9          | 79       | -147           | 2        |
| T6NN3  | -18.7          | 14       | -59.8          | 84       | -136.3         | 2        |
| T6NN4  | -24.6          | 14       | -59.7          | 85       | -135.1         | 1        |
| T6NN5  | -30.3          | 14       | -59.9          | 82       | -129           | 4        |
| T6NN10 | 14.6           | 21       | -58.1          | 79       |                |          |
| T8NN1  | -25.2          | 23       | -73.4          | 66       | -149.7         | 11       |
| T8NN2  | -21.0          | 24       | -61.2          | 67       | -163           | 9        |
| T8NN3  | -30.8          | 24       | -58.4          | 69       | -129.3         | 7        |
| T8NN4  | -31.4          | 24       | -55.5          | 69       | -129.1         | 7        |
| T8NN5  | -24.5          | 24       | -49.2          | 72       | -133.7         | 4        |
| T8NN10 | -36.1          | 24       | -52.5          | 71       | -126.8         | 5        |

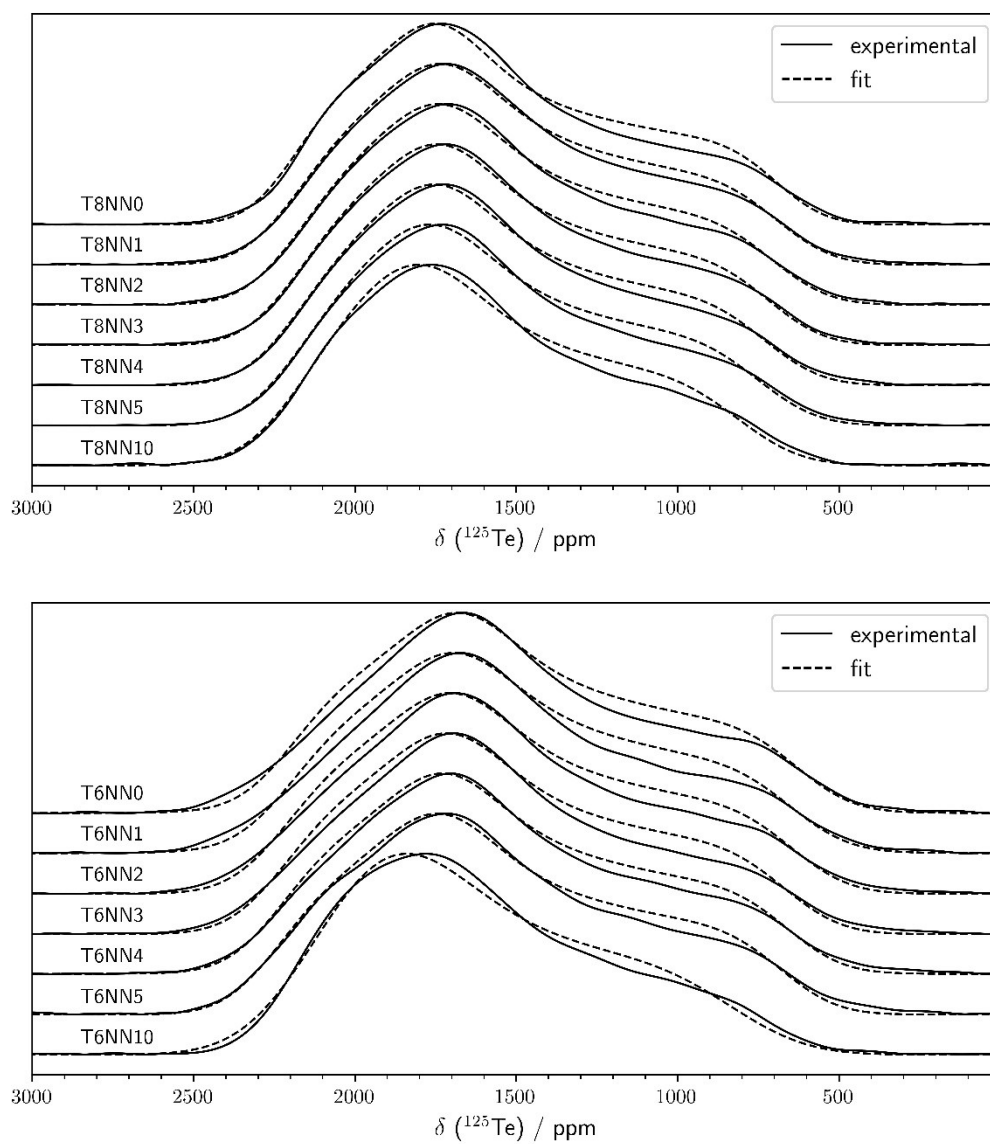

**Figure S6.** Static  $^{125}\text{Te}$  NMR spectra of the samples under study. Dashed curves illustrate tentative fits assuming single Te-sites with the chemical shift tensor values listed in Table S4.

**Table S4.** Tentative  $^{125}\text{Te}$  NMR lineshape fitting parameters for the glasses under study. Tensor elements are listed in the Haeberlen convention as well as principal axis values. The respective linebroadening paramter (lb) accounts for Gaussian type broadening of the resonance.

| <b>Sample</b> | <b><math>\delta_{\text{iso}}</math> /ppm</b> | <b><math>\delta_{\text{aniso}}</math> /ppm</b> | <b><math>\eta</math></b> | <b><math>\delta_{11}</math> /ppm</b> | <b><math>\delta_{22}</math> /ppm</b> | <b><math>\delta_{33}</math> /ppm</b> | <b>lb /kHz</b> |
|---------------|----------------------------------------------|------------------------------------------------|--------------------------|--------------------------------------|--------------------------------------|--------------------------------------|----------------|
| <b>T8NN0</b>  | 1536                                         | -854                                           | 0.52                     | 2185                                 | 1740                                 | 682                                  | 27.2           |
| <b>T8NN1</b>  | 1527                                         | -848                                           | 0.54                     | 2180                                 | 1722                                 | 679                                  | 30.6           |
| <b>T8NN2</b>  | 1532                                         | -839                                           | 0.53                     | 2172                                 | 1729                                 | 693                                  | 30.9           |
| <b>T8NN3</b>  | 1538                                         | -834                                           | 0.54                     | 2180                                 | 1729                                 | 704                                  | 30.3           |
| <b>T8NN4</b>  | 1544                                         | -828                                           | 0.53                     | 2177                                 | 1739                                 | 716                                  | 30.9           |
| <b>T8NN5</b>  | 1554                                         | -820                                           | 0.51                     | 2173                                 | 1755                                 | 734                                  | 32.1           |
| <b>T8NN10</b> | 1585                                         | -790                                           | 0.48                     | 2170                                 | 1790                                 | 795                                  | 33.4           |
| <b>T6NN0</b>  | 1494                                         | -878                                           | 0.59                     | 2192                                 | 1674                                 | 616                                  | 29.4           |
| <b>T6NN1</b>  | 1506                                         | -870                                           | 0.59                     | 2197                                 | 1684                                 | 636                                  | 30.7           |
| <b>T6NN2</b>  | 1513                                         | -880                                           | 0.59                     | 2193                                 | 1693                                 | 633                                  | 31.1           |
| <b>T6NN3</b>  | 1526                                         | -871                                           | 0.59                     | 2218                                 | 1704                                 | 655                                  | 31             |
| <b>T6NN4</b>  | 1530                                         | -884                                           | 0.58                     | 2228                                 | 1716                                 | 646                                  | 29.5           |
| <b>T6NN5</b>  | 1545                                         | -879                                           | 0.57                     | 2235                                 | 1734                                 | 666                                  | 30.7           |
| <b>T6NN10</b> | 1604                                         | -795                                           | 0.36                     | 2145                                 | 1858                                 | 809                                  | 40.1           |
